# Supplementary material for: Lasting consequences of psyllid (Bactericera cockerelli L.) infestation on tomato defense, gene expression, and growth
Source: PubMed Central journal article supplement (PMC7905647; doi:10.1186/s12870-021-02876-z), 2021-02-24
Supplement: 12870_2021_2876_MOESM1_ESM.pdf [file 12870_2021_2876_MOESM1_ESM.pdf]

| <b>Gene Name</b> | <b>Protein Name</b> | <b>Forward Primer (5'-&gt;3')</b> | <b>Reverse Primer (5'-&gt;3')</b> |
|------------------|---------------------|-----------------------------------|-----------------------------------|
| Solyc04g080860.1 | LON2                | CGTTAAGCATGAGCGGCTGG              | ATCATCCTCCCCATTCGCCG              |
| Solyc06g011350.2 | PIP2-4              | AAATTTTATGCACTGACGTGACAA          | CCACGCCTTGTCACCATTGA              |
| Solyc06g084040.2 | DRIP2               | TGCAGGGATGGCAATGTTCC              | AGTGCTAAATGACAGCCAAAGAGC          |
| Solyc08g008630.2 | D27                 | TACGGACAAGTACCACCGCC              | TGGTGCCTGCGTAGATACAGA             |
