# Supplementary material for: Lasting consequences of psyllid (Bactericera cockerelli L.) infestation on tomato defense, gene expression, and growth
Source: PubMed Central journal article supplement (PMC7905647; doi:10.1186/s12870-021-02876-z), 2021-02-24
Supplement: 12870_2021_2876_MOESM2_ESM.pdf [file 12870_2021_2876_MOESM2_ESM.pdf]

| <b>Treatment</b> | <b>Sample ID</b> | <b>Alignment Rate (%)</b> | <b>Reads</b> |
|------------------|------------------|---------------------------|--------------|
| Control          | 1                | 96.31                     | 17,358,465   |
| Control          | 2                | 96.45                     | 16,461,183   |
| Control          | 3                | 95.99                     | 18,455,303   |
| Psyllid-infested | 1                | 95.79                     | 18,557,929   |
| Psyllid-infested | 2                | 96.64                     | 17,347,190   |
| Psyllid-infested | 3                | 96.10                     | 18,381,570   |
